# Supplementary material
Source: publisher figshare collection journal article supplement (https://diabetesjournals.figshare.com/ndownloader/files/25899321)
Supplement: Supplementary file 1 [file 25899321]

## Supplementary Figures and Tables—Keleher et al. 2020

**Supplementary Figure S1.** Summary of representative images of proteins from WES runs.

### Inflammation

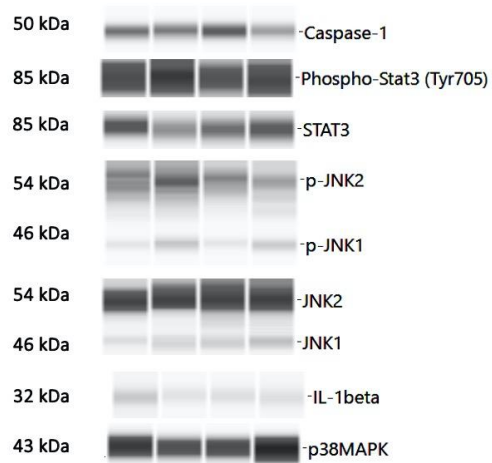

### Loading Controls

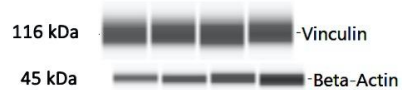

### Growth factor/insulin signaling

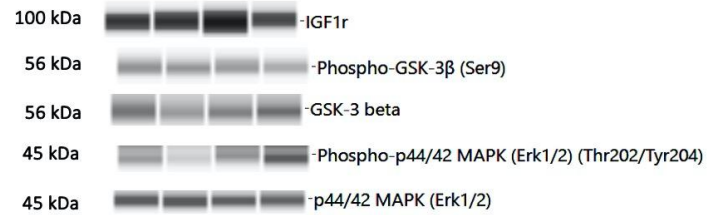

### Cortisol metabolism

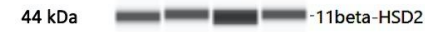

### Protein glycosylation

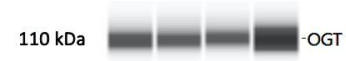

### Mitochondrial biogenesis and function

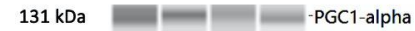

**Supplementary Figure S2.** Full images of proteins from WES runs.

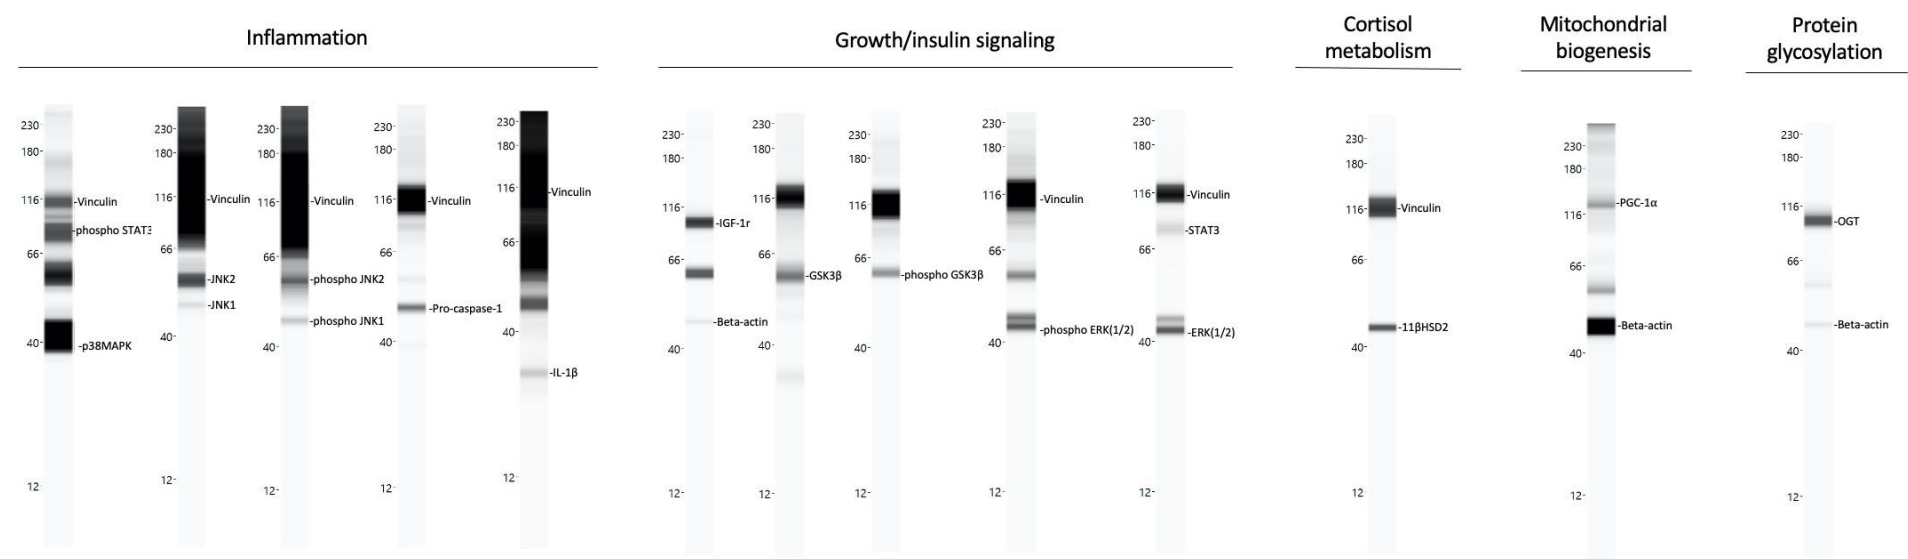

**Supplementary Figure S3.** Scatter plots showing relationships between proteins in the inflammation pathway and child outcomes. The MANOVA indicated a significant effect of these proteins on child body composition, however the MMR did not reach significance for adiposity or body weight (MMR p-values shown on graphs). A) Correlations showed a positive correlation between JNK2<sup>Thr183/Tyr185</sup>/JNK2 and adiposity ( $r = 0.253$ ,  $p = 0.0115$ ) and B) a positive correlation between STAT3<sup>Tyr705</sup> and adiposity ( $r = 0.324$ ,  $p = 0.010$ ).

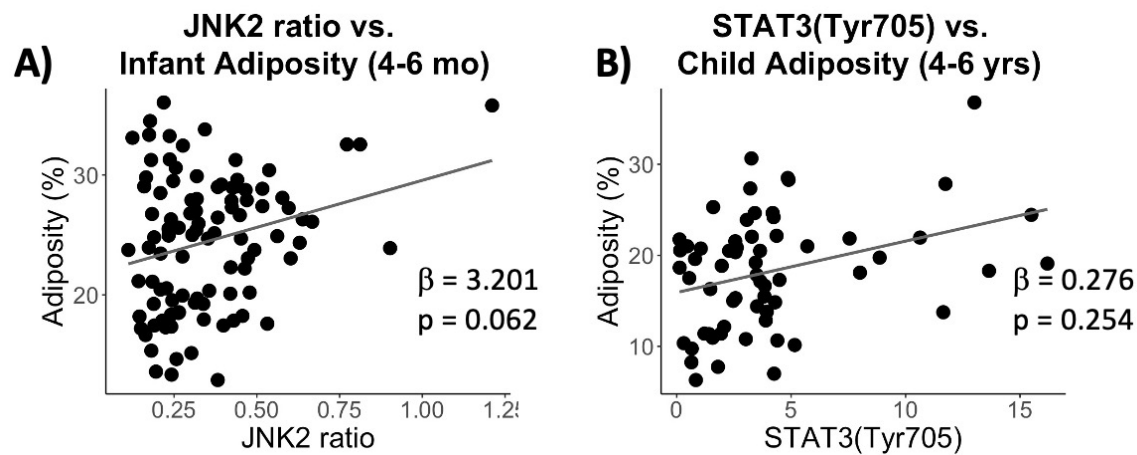

**Supplementary Table S1: Antibodies used.**

| Pathway                         | Target                                           | Molecular Weight (kDa) | Supplier  | Catalog #  | RRID        | Dilution |
|---------------------------------|--------------------------------------------------|------------------------|-----------|------------|-------------|----------|
| Inflammation                    | Pro-Caspase 1                                    | 50                     | CST       | 2225       | AB_2243894  | 1:100    |
|                                 | STAT3 <sup>Tyr705</sup>                          | 85                     | CST       | 9131       | AB_331586   | 1:10     |
|                                 | Stat3 (124H6)                                    | 85                     | CST       | 9139       | AB_331757   | 1:50     |
|                                 | JNK1 <sup>Thr183/Tyr185</sup> (81E11)            | 46                     | CST       | 4668       | AB_823588   | 1:100    |
|                                 | JNK2 <sup>Thr183/Tyr185</sup> (81E11)            | 54                     | CST       | 4668       | AB_823588   | 1:100    |
|                                 | JNK1 (SAPK/JNK)                                  | 46                     | CST       | 9252       | AB_2250373  | 1:100    |
|                                 | JNK2 (SAPK/JNK)                                  | 54                     | CST       | 9252       | AB_2250373  | 1:100    |
|                                 | IL-1 $\beta$                                     | 32                     | Abcam     | ab9787     | AB_308787   | 1:25     |
|                                 | p38MAPK                                          | 43                     | CST       | 9212       | AB_330713   | 1:100    |
| Growth Factor/Insulin Signaling | IGF1r                                            | 100                    | Novus Bio | NBP1-77680 | AB_11016057 | 1:100    |
|                                 | GSK3 $\beta$ <sup>Ser9</sup> (D85E12)            | 56                     | CST       | 5558       | AB_10013750 | 1:50     |
|                                 | GSK3 $\beta$                                     | 56                     | Novus Bio | NBP1-47470 | AB_10010422 | 1:100    |
|                                 | ERK(1/2) <sup>Thr202/Tyr204</sup> (D13.14.4E) XP | 45/49                  | CST       | 4370       | AB_2315112  | 1:200    |
|                                 | p44/42 MAPK (Erk1/2) (137F5)                     | 45/49                  | CST       | 4695       | AB_390779   | 1:200    |
| Cortisol Metabolism             | 11b-HSD2                                         | 44                     | R&D       | MAB8630    | NA          | 1:100    |
| Protein Glycosylation           | OGT (D1D8Q)                                      | 110                    | CST       | 23177      | AB_2798857  | 1:100    |
| Mitochondrial Biogenesis        | PGC1- $\alpha$                                   | 131                    | CST       | 2178       | AB_823600   | 1:25     |
| Loading Controls                | Vinculin                                         | 116                    | CST       | 13901      | AB_2728768  | 1:5000   |
|                                 | beta-actin                                       | 45                     | CST       | 4970       | AB_2223172  | 1:5000   |

**Supplementary Table S2. Transformations**

| Pathway                               | Protein                                     | Lambda value from Box Cox Transformation |
|---------------------------------------|---------------------------------------------|------------------------------------------|
| Inflammation                          | Pro-Caspase 1                               | -0.34                                    |
|                                       | STAT3 <sup>Tyr705</sup>                     | 0.26                                     |
|                                       | STAT3 <sup>Tyr705</sup> /STAT3              | 0.26                                     |
|                                       | JNK1 <sup>Thr183/Tyr185</sup>               | -0.06                                    |
|                                       | JNK1 <sup>Thr183/Tyr185</sup> /JNK1         | -0.18                                    |
|                                       | JNK2 <sup>Thr183/Tyr185</sup>               | -0.20                                    |
|                                       | JNK2 <sup>Thr183/Tyr185</sup> /JNK2         | -0.10                                    |
|                                       | IL-1 $\beta$                                | 0.26                                     |
|                                       | p38MAPK                                     | 0.26                                     |
| Growth Factor/Insulin Signaling       | IGF1r                                       | 0.14                                     |
|                                       | GSK3 $\beta$ <sup>Ser9</sup>                | inverse normal transformation            |
|                                       | GSK3 $\beta$ <sup>Ser9</sup> /GSK3          |                                          |
|                                       | ERK(1/2) <sup>Thr202/Tyr204</sup>           |                                          |
|                                       | ERK(1/2) <sup>Thr202/Tyr204</sup> /ERK(1/2) |                                          |
| Cortisol Metabolism                   | 11b-HSD2                                    | 0.14                                     |
| Protein Glycosylation                 | OGT                                         | 0.50                                     |
| Mitochondrial Biogenesis and Function | PGC1- $\alpha$                              | 0.14                                     |

**Supplementary Table S3.** Summary of the statistical models tested.

| Model Number | Model                                                                                               |
|--------------|-----------------------------------------------------------------------------------------------------|
| 1            | Proteins ~ Maternal BMI + Sex + Gestational Age                                                     |
| 2            | Adiposity (birth) + Body mass (birth) ~ Proteins + Sex + Gestational Age                            |
| 3            | Adiposity (infant) + Body mass (infant) ~ Proteins + Sex + Infant Age                               |
| 4            | $\Delta$ Adiposity (infant-birth) + $\Delta$ Body mass (infant-birth) ~ Proteins + Sex + Infant Age |
| 5            | Adiposity (child) + Body mass (child) ~ Proteins + Sex + Child Age                                  |
| 6            | Midthigh + Triceps + Subscapular Skinfolts ~ Proteins + Sex + Child Age                             |
| 7            | Child triglycerides ~ Proteins + Sex + Child Age                                                    |
| 8            | Child insulin ~ Proteins + Sex + Child Age                                                          |

**Supplementary Table S4.** Results of test for the effect of maternal BMI, on the protein pathways (maternal BMI was not significant)

| Pathway                               | Maternal BMI p-value | Sex p-value | Gestational Age p-value | Protein                                     | Maternal BMI p-value | Sex p-value | Gestational Age p-value |
|---------------------------------------|----------------------|-------------|-------------------------|---------------------------------------------|----------------------|-------------|-------------------------|
| Inflammation                          | 0.733                | 0.509       | 0.837                   | Pro-Caspase 1                               | 0.652                | 0.054       | 0.273                   |
|                                       |                      |             |                         | STAT3 <sup>Tyr705</sup>                     | 0.326                | 0.160       | 0.315                   |
|                                       |                      |             |                         | STAT3 <sup>Tyr705</sup> /STAT3              | 0.293                | 0.275       | 0.592                   |
|                                       |                      |             |                         | JNK1 <sup>Thr183/Tyr185</sup>               | 0.133                | 0.683       | 0.808                   |
|                                       |                      |             |                         | JNK1 <sup>Thr183/Tyr185</sup> /JNK1         | 0.404                | 0.505       | 0.865                   |
|                                       |                      |             |                         | JNK2 <sup>Thr183/Tyr185</sup>               | 0.195                | 0.195       | 0.779                   |
|                                       |                      |             |                         | JNK2 <sup>Thr183/Tyr185</sup> /JNK2         | 0.322                | 0.150       | 0.948                   |
|                                       |                      |             |                         | IL-1 $\beta$                                | 0.847                | 0.411       | 0.774                   |
| Growth Factor/Insulin Signaling       | 0.995                | 0.480       | 0.948                   | p38MAPK                                     | 0.437                | 0.333       | 0.323                   |
|                                       |                      |             |                         | IGF1r                                       | 0.836                | 0.945       | 0.530                   |
|                                       |                      |             |                         | GSK3 $\beta$ <sup>Ser9</sup>                | 0.619                | 0.377       | 0.790                   |
|                                       |                      |             |                         | GSK3 $\beta$ <sup>Ser9</sup> /GSK3          | 0.934                | 0.160       | 0.992                   |
|                                       |                      |             |                         | ERK(1/2) <sup>Thr202/Tyr204</sup>           | 0.573                | 0.159       | 0.497                   |
| Cortisol Metabolism                   | 0.803                | 0.984       | 0.282                   | ERK(1/2) <sup>Thr202/Tyr204</sup> /ERK(1/2) | 0.639                | 0.242       | 0.465                   |
|                                       |                      |             |                         | 11b-HSD2                                    | 0.820                | 0.936       | 0.282                   |
| Protein Glycosylation                 | 0.290                | 0.426       | 0.543                   | OGT                                         | 0.275                | 0.462       | 0.543                   |
| Mitochondrial Biogenesis and Function | 0.425                | 0.561       | 0.102                   | PGC1- $\alpha$                              | 0.467                | 0.466       | 0.102                   |

**Supplementary Table S5.** Results of MANOVA and MMR tests for the effect of cortisol metabolism on offspring traits (results discussed if the MANOVA was significant)

| Pathway             | Variable           | Birth            |        |                       |           | Infancy (4-6 months) |        |                       |           |                   |        |                         |       | Childhood (4-6 years) |        |                       |  |                     |         |                              |         |
|---------------------|--------------------|------------------|--------|-----------------------|-----------|----------------------|--------|-----------------------|-----------|-------------------|--------|-------------------------|-------|-----------------------|--------|-----------------------|--|---------------------|---------|------------------------------|---------|
|                     |                    | MANOVA           |        | MMR                   |           | MANOVA               |        | MMR                   |           | MANOVA            |        | MMR                     |       | MANOVA                |        | MMR                   |  | multiple regression |         | multiple regression          |         |
|                     |                    | p-value          | F stat | p-value               |           | p-value              | F stat | p-value               |           | p-value           | F stat | p-value                 |       | p-value               | F stat | p-value               |  | p-value             | t value | p-value                      | t value |
|                     |                    | Body Composition |        | Adiposity Body Weight |           | Body Composition     |        | Adiposity Body Weight |           | ΔBody Composition |        | ΔAdiposity ΔBody Weight |       | Body Composition      |        | Adiposity Body Weight |  | Skinfolds           |         | Midthigh Subscapular Triceps |         |
| cortisol metabolism | 11b-HSD2           | 0.983            | 0.017  |                       |           | 0.592                | 0.526  |                       |           | 0.441             | 0.825  |                         |       | 0.723                 | 0.326  |                       |  | 0.159               | 1.791   | 0.948                        | -0.065  |
|                     | Sex                | 0.008            | 5.048  | 0.314                 | 0.017     | 1.43E-07             | 18.724 | 5.910E-06             | 0.408     | 0.000             | 8.477  | 0.000                   | 0.201 | 0.199                 | 1.662  |                       |  | 0.505               | 0.789   | 0.879                        | -0.153  |
|                     | Age                | 5.533E-06        | 13.731 | 0.005                 | 8.800E-07 | 5.40E-08             | 20.102 | 0.362                 | 2.060E-05 | 5.498E-07         | 16.927 | 0.246                   | 0.002 | 0.229                 | 1.515  |                       |  | 0.025               | 3.347   | 0.520                        | -0.649  |
|                     | Degrees of Freedom | 98               |        |                       |           | 94                   |        |                       |           | 93                |        |                         |       | 58                    |        |                       |  | 62                  |         | 39                           |         |

**Supplementary Table S6.** Results of MANOVA and MMR tests for the effect of protein glycosylation on offspring traits.

| Pathway               | Variable           | Birth            |        |                       |           | Infancy (4-6 months) |        |                       |           |                   |        |                         |       | Childhood (4-6 years) |        |                       |  |                     |         |                              |         |
|-----------------------|--------------------|------------------|--------|-----------------------|-----------|----------------------|--------|-----------------------|-----------|-------------------|--------|-------------------------|-------|-----------------------|--------|-----------------------|--|---------------------|---------|------------------------------|---------|
|                       |                    | MANOVA           |        | MMR                   |           | MANOVA               |        | MMR                   |           | MANOVA            |        | MMR                     |       | MANOVA                |        | MMR                   |  | multiple regression |         | multiple regression          |         |
|                       |                    | p-value          | F stat | p-value               |           | p-value              | F stat | p-value               |           | p-value           | F stat | p-value                 |       | p-value               | F stat | p-value               |  | p-value             | t value | p-value                      | t value |
|                       |                    | Body Composition |        | Adiposity Body Weight |           | Body Composition     |        | Adiposity Body Weight |           | ΔBody Composition |        | ΔAdiposity ΔBody Weight |       | Body Composition      |        | Adiposity Body Weight |  | Skinfolds           |         | Midthigh Subscapular Triceps |         |
| protein glycosylation | OGT                | 0.515            | 0.667  |                       |           | 0.372                | 0.998  |                       |           | 0.441             | 0.826  |                         |       | 0.981                 | 0.019  |                       |  | 0.898               | 0.196   | 0.440                        | 0.780   |
|                       | Sex                | 0.009            | 4.950  | 0.286                 | 0.020     | 1.76E-07             | 18.436 | 8.380E-06             | 0.353     | 0.000             | 8.276  | 0.000                   | 0.211 | 0.184                 | 1.743  |                       |  | 0.511               | 0.778   | 0.982                        | -0.023  |
|                       | Age                | 4.002E-06        | 14.147 | 0.005                 | 6.440E-07 | 3.64E-08             | 20.667 | 0.110                 | 2.660E-05 | 3.531E-07         | 17.536 | 0.181                   | 0.002 | 0.229                 | 1.513  |                       |  | 0.060               | 2.602   | 0.455                        | -0.753  |
|                       | Degrees of Freedom | 98               |        |                       |           | 94                   |        |                       |           | 93                |        |                         |       | 60                    |        |                       |  | 39                  |         | 39                           |         |

**Supplementary Table S7.** Results of MANOVA and MMR tests for the effect of the growth/insulin signaling pathway proteins on offspring traits.

| Pathway                         | Variable                               | Birth            |        |                       |           | Infancy (4-6 months) |        |                       |           |                   |        |                         |       | Childhood (4-6 years) |        |                       |  |                     |         |                              |         |
|---------------------------------|----------------------------------------|------------------|--------|-----------------------|-----------|----------------------|--------|-----------------------|-----------|-------------------|--------|-------------------------|-------|-----------------------|--------|-----------------------|--|---------------------|---------|------------------------------|---------|
|                                 |                                        | MANOVA           |        | MMR                   |           | MANOVA               |        | MMR                   |           | MANOVA            |        | MMR                     |       | MANOVA                |        | MMR                   |  | multiple regression |         | multiple regression          |         |
|                                 |                                        | p-value          | F stat | p-value               |           | p-value              | F stat | p-value               |           | p-value           | F stat | p-value                 |       | p-value               | F stat | p-value               |  | p-value             | t value | p-value                      | t value |
|                                 |                                        | Body Composition |        | Adiposity Body Weight |           | Body Composition     |        | Adiposity Body Weight |           | ΔBody Composition |        | ΔAdiposity ΔBody Weight |       | Body Composition      |        | Adiposity Body Weight |  | Skinfolds           |         | Midthigh Subscapular Triceps |         |
| growth factor/insulin signaling | IGF1r                                  | 0.045            | 3.217  | 0.016                 | 0.211     | 0.940                | 0.062  |                       |           | 0.231             | 1.491  |                         |       | 0.936                 | 0.066  |                       |  | 0.270               | 1.343   | 0.647                        | -0.462  |
|                                 | GSK3β <sup>WT</sup>                    | 0.812            | 0.208  |                       |           | 0.779                | 0.250  |                       |           | 0.625             | 0.472  |                         |       | 0.620                 | 0.482  |                       |  | 0.005               | 4.773   | 0.702                        | 0.386   |
|                                 | GSK3β <sup>WT</sup> /GSK3              | 0.378            | 0.983  |                       |           | 0.145                | 1.972  |                       |           | 0.710             | 0.344  |                         |       | 0.548                 | 0.608  |                       |  | 0.745               | 0.413   | 0.725                        | -0.355  |
|                                 | ERK(1/2) <sup>WT</sup> /Er204          | 0.507            | 0.685  |                       |           | 0.491                | 0.716  |                       |           | 0.095             | 2.416  |                         |       | 0.233                 | 1.498  |                       |  | 0.171               | 1.730   | 0.101                        | -1.680  |
|                                 | ERK(1/2) <sup>WT</sup> /Er204/ERK(1/2) | 0.864            | 0.146  |                       |           | 0.480                | 0.739  |                       |           | 0.842             | 0.173  |                         |       | 0.655                 | 0.426  |                       |  | 0.004               | 4.953   | 0.142                        | 1.497   |
|                                 | Sex                                    | 0.012            | 4.654  | 0.369                 | 0.023     | 2.35E-07             | 18.172 | 1.210E-05             | 0.327     | 0.001             | 8.197  | 0.000                   | 0.247 | 0.138                 | 2.057  |                       |  | 0.748               | 0.408   | 0.990                        | -0.013  |
|                                 | Age                                    | 1.11E-05         | 12.914 | 0.004                 | 1.960E-06 | 5.55E-08             | 20.232 | 0.176                 | 1.930E-05 | 8.665E-07         | 16.427 | 0.234                   | 0.003 | 0.287                 | 1.277  |                       |  | 0.082               | 2.351   | 0.301                        | -1.048  |
|                                 | Degrees of Freedom                     | 94               |        |                       |           | 90                   |        |                       |           | 89                |        |                         |       | 54                    |        |                       |  | 58                  |         | 39                           |         |

**Supplementary Table S8.** Results of MANOVA and MMR tests for the effect of the inflammation pathway proteins on offspring traits.

| Pathway      | Variable                      | Birth            |        |                       |           | Infancy (4-6 months) |        |                       |           |                   |        |                         |       | Childhood (4-6 years) |        |                       |       |                     |         |                              |         |
|--------------|-------------------------------|------------------|--------|-----------------------|-----------|----------------------|--------|-----------------------|-----------|-------------------|--------|-------------------------|-------|-----------------------|--------|-----------------------|-------|---------------------|---------|------------------------------|---------|
|              |                               | MANOVA           |        | MMR                   |           | MANOVA               |        | MMR                   |           | MANOVA            |        | MMR                     |       | MANOVA                |        | MMR                   |       | multiple regression |         | multiple regression          |         |
|              |                               | p-value          | F stat | p-value               |           | p-value              | F stat | p-value               |           | p-value           | F stat | p-value                 |       | p-value               | F stat | p-value               |       | p-value             | t value | p-value                      | t value |
|              |                               | Body Composition |        | Adiposity Body Weight |           | Body Composition     |        | Adiposity Body Weight |           | ΔBody Composition |        | ΔAdiposity ΔBody Weight |       | Body Composition      |        | Adiposity Body Weight |       | Skinfolds           |         | Midthigh Subscapular Triceps |         |
| Inflammation | Pro-Caspase 1                 | 0.318            | 1.159  |                       |           | 0.323                | 1.145  |                       |           | 0.290             | 1.258  |                         |       | 0.276                 | 1.323  |                       |       | 0.374               | 1.060   | 0.239                        | -1.197  |
|              | STAT3 <sup>WT</sup>           | 0.740            | 0.302  |                       |           | 0.076                | 2.659  |                       |           | 0.383             | 0.970  |                         |       | 0.047                 | 3.253  | 0.254                 | 0.341 | 0.732               | 0.431   | 0.802                        | -0.253  |
|              | STAT3 <sup>WT</sup> /STAT3    | 0.245            | 1.426  |                       |           | 0.199                | 1.647  |                       |           | 0.024             | 3.911  | 0.194                   | 0.216 | 0.992                 | 0.008  |                       |       | 0.617               | 0.601   | 0.805                        | 0.249   |
|              | JNK1 <sup>WT</sup> /p185      | 0.225            | 1.516  |                       |           | 0.441                | 0.827  |                       |           | 0.632             | 0.461  |                         |       | 0.838                 | 0.177  |                       |       | 0.479               | 0.838   | 0.761                        | -0.306  |
|              | JNK1 <sup>WT</sup> /p185/JNK1 | 0.918            | 0.086  |                       |           | 0.962                | 0.039  |                       |           | 0.665             | 0.410  |                         |       | 0.081                 | 2.649  |                       |       | 0.597               | 0.634   | 0.540                        | 0.619   |
|              | JNK2 <sup>WT</sup> /p185      | 0.789            | 0.238  |                       |           | 0.155                | 1.903  |                       |           | 0.432             | 0.847  |                         |       | 0.666                 | 0.410  |                       |       | 0.064               | 2.571   | 0.325                        | 0.998   |
|              | JNK2 <sup>WT</sup> /p185/JNK2 | 0.399            | 0.929  |                       |           | 0.006                | 5.528  | 0.141                 | 0.755     | 0.069             | 2.757  |                         |       | 0.129                 | 2.132  |                       |       | 0.037               | 3.044   | 0.352                        | -0.943  |
|              | IL-1β                         | 0.109            | 2.269  |                       |           | 0.310                | 1.187  |                       |           | 0.108             | 2.285  |                         |       | 0.368                 | 1.021  |                       |       | 0.216               | 1.538   | 0.968                        | 0.041   |
|              | p38MAPK                       | 0.885            | 0.122  |                       |           | 0.012                | 4.614  | 0.291                 | 0.221     | 0.008             | 5.148  | 0.007                   | 0.141 | 0.095                 | 2.472  |                       |       | 0.484               | 0.830   | 0.881                        | -0.150  |
|              | Sex                           | 0.006            | 5.397  | 0.229                 | 0.016     | 3.38E-06             | 14.637 | 9.580E-05             | 0.324     | 0.004             | 5.802  | 0.002                   | 0.333 | 0.117                 | 2.245  |                       |       | 0.195               | 1.626   | 0.685                        | 0.410   |
|              | Age                           | 6.43E-05         | 13.693 | 0.004                 | 1.120E-06 | 2.55E-07             | 18.208 | 0.094                 | 2.620E-04 | 2.055E-06         | 15.367 | 0.376                   | 0.002 | 0.353                 | 1.064  |                       |       | 0.039               | 2.997   | 0.330                        | -0.988  |
|              | Degrees of Freedom            | 90               |        |                       |           | 86                   |        |                       |           | 87                |        |                         |       | 50                    |        |                       |       | 54                  |         | 35                           |         |

**Supplementary Table S9.** Results of MANOVA and MMR tests for the effect of mitochondria biogenesis on offspring traits.

| Pathway                               | Variable           | Birth            |        |                       |           | Infancy (4-6 months) |        |                       |           |                   |        |                         |       | Childhood (4-6 years) |        |                       |  |                     |         |                              |         |
|---------------------------------------|--------------------|------------------|--------|-----------------------|-----------|----------------------|--------|-----------------------|-----------|-------------------|--------|-------------------------|-------|-----------------------|--------|-----------------------|--|---------------------|---------|------------------------------|---------|
|                                       |                    | MANOVA           |        | MMR                   |           | MANOVA               |        | MMR                   |           | MANOVA            |        | MMR                     |       | MANOVA                |        | MMR                   |  | multiple regression |         | multiple regression          |         |
|                                       |                    | p-value          | F stat | p-value               |           | p-value              | F stat | p-value               |           | p-value           | F stat | p-value                 |       | p-value               | F stat | p-value               |  | p-value             | t value | p-value                      | t value |
|                                       |                    | Body Composition |        | Adiposity Body Weight |           | Body Composition     |        | Adiposity Body Weight |           | ΔBody Composition |        | ΔAdiposity ΔBody Weight |       | Body Composition      |        | Adiposity Body Weight |  | Skinfolds           |         | Midthigh Subscapular Triceps |         |
| mitochondrial biogenesis and function | PGC1-α             | 0.462            | 0.778  |                       |           | 0.239                | 1.455  |                       |           | 0.457             | 0.790  |                         |       | 0.331                 | 1.128  |                       |  | 0.336               | 1.150   | 0.019                        | 2.443   |
|                                       | Sex                | 0.011            | 4.730  | 0.403                 | 0.013     | 2.79E-07             | 17.799 | 7.710E-06             | 0.373     | 0.001             | 7.791  | 0.000                   | 0.231 | 0.137                 | 2.061  |                       |  | 0.527               | 0.749   | 0.965                        | 0.044   |
|                                       | Age                | 4.090E-06        | 14.119 | 0.003                 | 7.110E-07 | 7.57E-08             | 19.621 | 0.152                 | 2.810E-05 | 4.984E-07         | 17.062 | 0.248                   | 0.001 | 0.229                 | 1.512  |                       |  | 0.067               | 2.508   | 0.532                        | -0.630  |
|                                       | Degrees of Freedom | 98               |        |                       |           | 94                   |        |                       |           | 93                |        |                         |       | 60                    |        |                       |  | 60                  |         | 43                           |         |
